13. Eisner BH, Eisenberg ML, Stoller ML. Relationship between body mass index and quantitative 24-hour urine chemistries in patients with nephrolithiasis. *Urology* 2010; 75: 1289–1293
14. Taylor EN, Fung TT, Curhan GC. DASH-style diet associates with reduced risk for kidney stones. *J Am Soc Nephrol* 2009; 20: 2253–2259
15. Taylor EN, Stempfer J, Mount DB *et al.* DASH-style diet and 24-hour urine composition. *Clin J Am Soc Nephrol* 2010; 5: 2315–2322
16. Ferraro PM, Taylor EN, Gambaro G *et al.* Soda and other beverages and the risk of kidney stones. *Clin J Am Soc Nephrol* 2013; 8: 1389–1395
17. Hesse A, Schneeberger W, Engfeld S *et al.* Intestinal hyperabsorption of oxalate in calcium oxalate stone formers: application of a new test with [13C2]oxalate. *J Am Soc Nephrol* 1999; 10(Suppl): S329–S333
18. Siener R, Ebert D, Nicolay C *et al.* Dietary risk factors for hyperoxaluria in calcium oxalate stone formers. *Kidney Int* 2003; 63: 1037–1043
19. Urivetzky M, Kessaris D, Smith AD. Ascorbic acid overdosing: a risk factor for calcium oxalate nephrolithiasis. *J Urol* 1992; 147: 1215–1218
20. Trinchieri A, Ostini F, Nespoli R *et al.* Hyperoxaluria in patients with idiopathic calcium nephrolithiasis. *J Nephrol* 1998; 11(Suppl. 1): 70–72
21. Siener R, Bangen U, Sidhu H *et al.* The role of *Oxalobacter formigenes* colonization in calcium oxalate stone disease. *Kidney Int* 2013; 83: 1144–1149
22. Moran CP, Shanahan F. Gut microbiota and obesity: role in aetiology and potential therapeutic target. *Best Pract Res Clin Gastroenterol.* 2014; 28: 585–597
23. Rendina D, De Filippo G, D'Elia L *et al.* Metabolic syndrome and nephrolithiasis: a systematic review and meta-analysis of the scientific evidence. *J Nephrol* 2014; 27: 371–376
24. Nouvenne A, Ticinesi A, Guerra A *et al.* Influence of lean and fat mass on bone mineral density and on urinary stone risk factors in healthy women. *J Transl Med* 2013; 11: 248
25. Remer T, Berkemeyer S, Rylander R *et al.* Muscularity and adiposity in addition to net acid excretion as predictors of 24-h urinary pH in young adults and elderly. *Eur J Clin Nutr* 2007; 61: 605–609
26. Curhan GC, Willett WC, Speizer FE *et al.* Twenty-four-hour urine chemistries and the risk of kidney stones among women and men. *Kidney Int* 2001; 59: 2290–2298
27. Ferraro PM, Taylor EN, Eisner BH *et al.* History of kidney stones and the risk of coronary heart disease. *JAMA* 2013; 310: 408–415
28. Alexander RT, Hemmelgarn BR, Wiebe N *et al.* Alberta Kidney Disease Network. Kidney stones and cardiovascular events: a cohort study. *Clin J Am Soc Nephrol* 2014; 9: 506–512

Received for publication: 19.8.2014; Accepted in revised form: 7.10.2014

*Nephrol Dial Transplant* (2015) 30: 613–621  
doi: 10.1093/ndt/gfu352  
Advance Access publication 13 November 2014

## Prevalence and correlates of gout in a large cohort of patients with chronic kidney disease: the German Chronic Kidney Disease (GCKD) study

Jiaojiao Jing<sup>1</sup>, Jan T. Kielstein<sup>2</sup>, Ulla T. Schultheiss<sup>1</sup>, Thomas Sitter<sup>3</sup>, Stephanie I. Titze<sup>4</sup>, Elke S. Schaeffner<sup>5</sup>, Mara McAdams-DeMarco<sup>6</sup>, Florian Kronenberg<sup>7</sup>, Kai-Uwe Eckardt<sup>4</sup> and Anna Köttgen<sup>1</sup> for the GCKD Study Investigators

<sup>1</sup>Renal Division, Medical Center–University of Freiburg, Freiburg, Germany, <sup>2</sup>Department of Nephrology and Hypertension, Hannover Medical School, Hannover, Germany, <sup>3</sup>Department of Medicine, Ludwig-Maximilians-University Hospital, Munich, Germany, <sup>4</sup>Department of Nephrology and Hypertension, University of Erlangen-Nürnberg, Erlangen, Germany, <sup>5</sup>Division of Nephrology and Intensive Care Medicine, Charité University Medicine, Berlin, Germany, <sup>6</sup>Department of Epidemiology, Johns Hopkins Bloomberg School of Public Health, Baltimore, USA and <sup>7</sup>Division of Genetic Epidemiology, Innsbruck Medical University, Innsbruck, Austria

Correspondence and offprint requests to: Anna Köttgen; E-mail [anna.koettgen@uniklinik-freiburg.de](mailto:anna.koettgen@uniklinik-freiburg.de)

### ABSTRACT

**Background.** Reduced kidney function is a risk factor for hyperuricaemia and gout, but limited information on the burden of gout is available from studies of patients with chronic kidney disease (CKD). We therefore examined the prevalence

and correlates of gout in the large prospective observational German Chronic Kidney Disease (GCKD) study.

**Methods.** Data from 5085 CKD patients aged 18–74 years with an estimated glomerular filtration rate (eGFR) of 30–<60 mL/min/1.73 m<sup>2</sup> or eGFR ≥60 and overt proteinuria at recruitment and non-missing values for self-reported gout, medications and urate measurements from a central laboratory were evaluated.

**Results.** The overall prevalence of gout was 24.3%, and increased from 16.0% in those with  $\text{eGFR} \geq 60 \text{ mL/min/1.73 m}^2$  to 35.6% in those with  $\text{eGFR} < 30$ . Of those with self-reported gout, 30.7% of individuals were not currently taking any gout medication and among gout patients on urate lowering therapy, 47.2% still showed hyperuricaemia. Factors associated with gout were serum urate, lower  $\text{eGFR}$ , advanced age, male sex, higher body mass index and waist-to-hip ratio, higher triglyceride and C-reactive protein (CRP) concentrations, alcohol intake and diuretics use. While lower  $\text{eGFR}$  categories showed significant associations with gout in multivariable-adjusted models (prevalence ratio 1.46 for  $\text{eGFR} < 30$  compared with  $\text{eGFR} \geq 60$ , 95% confidence interval 1.21–1.77), associations between gout and higher urinary albumin-to-creatinine ratio in this CKD population were not significant.

**Conclusions.** Self-reported gout is common among patients with CKD and lower GFR is strongly associated with gout. Pharmacological management of gout in patients with CKD is suboptimal. Prospective follow-up will show whether gout and hyperuricaemia increase the risk of CKD progression and cardiovascular events in the GCKD study.

**Keywords:** chronic kidney disease, correlates, estimated glomerular filtration rate, GCKD study, gout epidemiology, observational study

## INTRODUCTION

Gout is a common and painful inflammatory arthritis [1–3], caused by urate crystal deposition in tissues and joints when local concentrations of urate exceed its physiological solubility threshold [4]. The burden of gout in the general population is increasing worldwide [5–8], with reported prevalence between 0.53 and 6.1% [9]. Due to the high morbidity, treatment and consequences associated with gout, this inflammatory arthritis poses a substantial financial burden to the health-care system [10, 11]. The management of gout is reported to be suboptimal [5], and a better understanding of the pathophysiology of gout and its correlates is a first step to improve diagnosis and treatment.

Correlates for gout have been examined in numerous studies. The most clinically relevant correlates are male sex, obesity, the metabolic syndrome and its components, dietary factors, hypertension and the current use of diuretics [12–19]. Reduced kidney function leads to accumulation of urate in the blood since renal elimination is the main endogenous mechanism of regulating serum urate concentrations [20]. Numerous studies have demonstrated that hyperuricaemia is associated with a reduced estimated glomerular filtration rate ( $\text{eGFR}$ ) in population-based settings, and one study suggested that adults with  $\text{eGFR} < 60 \text{ mL/min/1.73 m}^2$  are at a 2-fold increased risk of developing hyperuricaemia [21]. However, only a limited number of studies have investigated gout in individuals with chronic kidney disease (CKD), although they represent a high-risk population for the condition [22–24]. Moreover, many studies only evaluated the effect of reduced  $\text{eGFR}$  on the risk of hyperuricaemia or gout [7, 25], whereas the urinary albumin-to-creatinine ratio (UACR) is also used to

define CKD [26]. Of previous population-based studies, an association between higher albuminuria and the prevalence or risk of gout or hyperuricaemia has been reported in some [22] but not all studies [27]. In CKD populations, levels of albuminuria are typically much higher compared with the general population. Thus, the study of gout in populations with CKD and specifically the relationship of both  $\text{eGFR}$  and albuminuria with gout deserve further investigation.

We therefore examined the prevalence, correlates and management of gout in a large cohort of 5085 participants of the German Chronic Kidney Disease (GCKD) study. Our objectives were (i) to quantify the prevalence of hyperuricaemia and gout as well as their pharmacological treatment; (ii) to assess the association of both kidney function parameters  $\text{eGFR}$  and UACR and the underlying cause of disease with the prevalence of gout and serum urate levels/hyperuricaemia and (iii) to identify correlates of gout in the setting of CKD that may be modifiable.

## MATERIALS AND METHODS

### Study population

The GCKD study is an ongoing prospective observational study. To systematically investigate correlates and consequences of CKD, 5217 Caucasian patients aged 18–74 years with an  $\text{eGFR}$  ranging from 30 to  $60 \text{ mL/min/1.73 m}^2$  or overt proteinuria in the setting of  $\text{eGFR} > 60 \text{ mL/min/1.73 m}^2$  were enrolled across Germany between 2010 and 2012 as described previously [28]. Patients provided written informed consent, and the study was approved by the Ethics Boards of all nine participating study centres. For the present study, we analysed data from 5085 patients with non-missing values for self-reported gout, urate measurements,  $\text{eGFR}$  and UACR at the baseline visit.

### Assessment of gout

Gout status was ascertained through a standardized interview administered by trained interviewers. Gout was considered present when a patient gave an affirmative answer to the question ‘have you ever been told by a physician that you have gout?’ Self-reported gout has been described as reliable in previous epidemiologic studies in the general population [29]. Uric acid was measured from serum using an enzymatic colorimetric test (UA Plus, Roche/Hitachi Diagnostics GmbH, Mannheim, Germany). Hyperuricaemia was defined as  $> 420 \mu\text{mol/L}$  (7 mg/dL) in men and  $> 357 \mu\text{mol/L}$  (6 mg/dL) in women [22, 30].

### Glomerular filtration rate and albuminuria

Serum and urine creatinine were measured using the CREA plus (Roche/Hitachi Diagnostics GmbH, Mannheim, Germany) assay and urine albumin using the ALBU-XS assay (Roche/Hitachi Diagnostics GmbH, Mannheim, Germany). Estimated GFR was calculated from serum creatinine using the Chronic Kidney Disease Epidemiology Collaboration formula [31]. The UACR (mg/g) was based on urine albumin (mg/dL)/urine creatinine (g/dL). According to the Kidney Disease: Improving Global Outcomes CKD guidelines [26], GFR categories were defined as follows:  $\geq 60 \text{ mL/min/1.73 m}^2$  (G1/2), 45–59 (G3a), 30–44 (G3b) and  $< 30$  (G4/5), while UACR was categorized into

A1 (<30 mg/g, normoalbuminuria), A2 (30–<300 mg/g, microalbuminuria) and A3 (≥300 mg/g, macroalbuminuria).

### Assessment of renal diagnosis

To obtain information on the underlying cause of CKD, the patient's treating nephrologists were asked to choose from a given list of aetiologic categories, which were summarized into the groups diabetic nephropathy, nephrosclerosis, primary glomerular disease, interstitial nephropathy, acute kidney injury, systemic diseases, solitary kidney, hereditary diseases, obstructive uropathy or miscellaneous.

### Assessment of demographic, anthropometric and medical covariates

Age, gender and menopausal status were recorded at study entry, and weight, height, waist, hip circumference and blood pressure (BP) were measured by trained and certified study personnel in a standardized way. BP was measured three times after 5 min of rest in a sitting position using Omron M5 Professional devices (article number: Art.-Nr. HEM-7213-D, <http://www.omron-medizintechnik.de/>). Uric acid, cholesterol, high-density lipoprotein cholesterol, triglycerides, C-reactive protein (CRP) and other laboratory parameters were measured in a central laboratory from blood and urine collected at the enrolment visit. Every medication currently taken by a patient was recorded, and active ingredients were coded using the latest Anatomical Therapeutic Chemical (ATC) codes ([http://www.wido.de/amtl\\_atc-code.html](http://www.wido.de/amtl_atc-code.html), version for 2013). The intake of gout medication was based on the codes M04AA, M04AB, M04AC, M04AH and M04AX. Codes C09A and C09B were used to define angiotensin-converting enzyme inhibitor intake, and C03 represented diuretics intake.

Body mass index (BMI, kg/m<sup>2</sup>) was calculated from patient weight and height, and obesity was defined as BMI >30 kg/m<sup>2</sup>. Waist-to-hip ratio (WHR) was calculated from measured values. Systolic and diastolic BP was calculated as the mean of three measurements per person, where hypertension was defined as systolic BP ≥140 mmHg and/or diastolic BP ≥90 mmHg and/or use of antihypertensive medications. Diabetes was defined as HbA1c ≥6.5% or current use of at least one anti-diabetic medication. Coronary heart disease (CHD) was defined as present based on self-reported history of myocardial infarction or coronary reperfusion procedure (bypass or angioplasty). Alcohol intake was dichotomized as 'no or little' (alcohol consumption on <3 days/week) or 'moderate to large amount.'

### Statistical analysis

Characteristics of the GCKD population by gout status or eGFR and UACR categories were compared using *t*- and  $\chi^2$  tests for continuous and categorical variables as appropriate. Variables that were clearly not normally distributed were compared across categories using Wilcoxon tests.

Gout prevalence was obtained by tabulation across categories of eGFR and UACR. Modified Poisson regression models were used to estimate prevalence ratios (PRs) [32] for gout according to kidney function measures, and compared with those from logistic regression analyses. Linear regression

analyses were employed to model the relationship between uric acid and kidney function measures. All regression analyses evaluated three separate models: model 1 was unadjusted, model 2 adjusted for age, sex and study centre as covariates and model 3 included a full set of known gout correlates: age, sex, study centre, BMI, WHR, systolic BP, triglycerides, CRP, high-density lipoprotein (HDL) cholesterol, alcohol intake, diuretics use, CHD and diabetes. Among variables in model 3, triglycerides, CRP and UACR were log transformed, and WHR was examined per standard deviation (SD) increase, age per 5-year intervals and systolic BP per 10-mmHg increase. Gout medication use, cholesterol and hypertension were not included in the multivariate regression models due to high correlations with gout, HDL cholesterol and systolic BP, respectively. To allow for a direct comparison between models, the study population of models 1 and 2 was restricted to individuals with complete information for model 3.

To evaluate the impact of uric acid as a mediator of the association between kidney function and gout, additional regression models included serum urate concentrations as a covariable. Likelihood ratio tests were used to check the difference between models with and without the inclusion of serum urate concentrations and gout medication intake. Subgroup analyses were conducted across strata of gout medication intake.

Scatter and line plots were used to illustrate the correlation between uric acid and eGFR or UACR by gender. The proportion of the GCKD baseline population with gout and hyperuricaemia was illustrated across the range of eGFR using a linear spline with knots at 30, 60 and 90. In addition, the distribution of GFR and UACR by gout status and gout medication was plotted using kernel density plots. All analyses were conducted using Stata 13.0 (Stata Corp LP, College Park, TX).

## RESULTS

### Characteristics of the study population and gout medication intake

The study sample characteristics of up to 5085 patients with non-missing information on gout, urate measurements, eGFR and UACR are shown in Table 1; overall, 1238 of 5085 patients (24.3%) reported to have gout. The prevalence, mean or median of most correlates was clearly higher in gout patients compared with those without gout. However, both serum urate concentrations and the prevalence of hyperuricaemia were similar between the two groups, which may have resulted from the higher proportion of gout medication use among CKD patients with gout compared with those without.

Table 2 gives an overview of the current use of gout medications, both overall and separately for CKD patients with and without gout. Of all 5085 GCKD participants, 32.5% currently use gout medication (69.3% of those with and 20.7% of those without gout,  $P < 0.001$ ), which means that approximately one-third of the patients with self-reported gout were not currently taking any gout medication. Uricosstatics identified by ATC codes were by far the most common medication category, and allopurinol accounted for >97% of the uricosstatic treatment. Uricosurics, especially benzbromarone, were used by few individuals (2.8% of

**Table 1. Characteristics of the GCKD population by gout status**

| Characteristic                           | Overall ( <i>n</i> = 5085) | No gout ( <i>n</i> = 3847) | Gout ( <i>n</i> = 1238) | P value | <i>n</i> |
|------------------------------------------|----------------------------|----------------------------|-------------------------|---------|----------|
| Serum urate, mg/dL                       | 7.21 ± 1.91                | 7.20 ± 1.91                | 7.22 ± 1.93             | 0.685   | 5085     |
| Hyperuricaemia                           | 61.0%                      | 62.2%                      | 57.4%                   | 0.003   | 5085     |
| Gout medication use                      | 32.5%                      | 20.7%                      | 69.3%                   | <0.001  | 5085     |
| Female                                   | 39.9%                      | 44.5%                      | 25.7%                   | <0.001  | 5085     |
| Postmenopausal                           | 80.0%                      | 77.9%                      | 91.1%                   | <0.001  | 1989     |
| Age, years                               | 60.1 ± 12.0                | 59.1 ± 12.6                | 63.1 ± 9.0              | <0.001  | 5085     |
| BMI, kg/m <sup>2</sup>                   | 29.8 ± 6.0                 | 29.2 ± 5.8                 | 31.5 ± 6.1              | <0.001  | 5028     |
| Obesity                                  | 42.8%                      | 38.8%                      | 55.4%                   | <0.001  | 5028     |
| Waist-to-hip ratio                       | 0.94 ± 0.09                | 0.93 ± 0.09                | 0.97 ± 0.08             | <0.001  | 4945     |
| Systolic blood pressure, mmHg            | 139.5 ± 20.3               | 138.8 ± 20.1               | 141.4 ± 20.9            | <0.001  | 5056     |
| Cholesterol, mg/dL                       | 211.4 ± 53.0               | 213.2 ± 53.3               | 206.0 ± 51.5            | <0.001  | 5083     |
| HDL cholesterol, mg/dL                   | 52.0 ± 18.2                | 53.5 ± 18.5                | 47.2 ± 16.2             | <0.001  | 5080     |
| Triglycerides, mg/dL                     | 168.4 (118.0, 239.9)       | 161.8 (114.0, 230.6)       | 192.4 (131.0, 270.1)    | <0.001  | 5076     |
| CRP, mg/L                                | 2.3 (1.0, 5.0)             | 2.1 (1.0, 4.6)             | 3.0 (1.4, 6.5)          | <0.001  | 5082     |
| Diabetes                                 | 36.8%                      | 33.8%                      | 46.3%                   | <0.001  | 5085     |
| Coronary heart disease                   | 19.8%                      | 17.6%                      | 26.7%                   | <0.001  | 5085     |
| Hypertension                             | 95.1%                      | 94.3%                      | 97.4%                   | <0.001  | 5085     |
| Alcohol intake, moderate to large amount | 18.9%                      | 17.3%                      | 24.0%                   | <0.001  | 5057     |
| ACE inhibitor use                        | 47.1%                      | 47.0%                      | 47.6%                   | 0.711   | 5085     |
| Angiotensin receptor blocker use         | 38.9%                      | 38.1%                      | 41.2%                   | 0.053   | 5085     |
| Diuretics use                            | 60.2%                      | 56.0%                      | 73.3%                   | <0.001  | 5085     |
| UACR, mg/g                               | 50.9 (9.6, 391.3)          | 48.8 (9.4, 385.4)          | 60.3 (10.0, 405.7)      | 0.989   | 5085     |
| eGFR, mL/min/1.73 m <sup>2</sup>         | 49.4 ± 18.2                | 50.9 ± 19.0                | 44.9 ± 14.9             | <0.001  | 5085     |

Numbers are mean and SD or proportion. For triglycerides, UACR and CRP, median and the 25th and 75th percentile are shown.

**Table 2. Prevalence of uric acid lowering medication intake**

| Medications         | Overall ( <i>n</i> = 5085) | No gout ( <i>n</i> = 3847) | Gout ( <i>n</i> = 1238) | P value | ATC code         |
|---------------------|----------------------------|----------------------------|-------------------------|---------|------------------|
| Any gout medication | 32.5% (1653)               | 20.7% (795)                | 69.3% (858)             | <0.001  | M04              |
| Uricosstatics       | 31.4% (1598)               | 20.0% (769)                | 67.0% (829)             | <0.001  | M04AA            |
| Allopurinol         | 30.7% (1562)               | 19.7% (757)                | 65.0% (805)             | <0.001  | M04AA01; M04AA51 |
| Febuxostat          | 0.77% (39)                 | 0.31% (12)                 | 2.18% (27)              | <0.001  | M04AA03          |
| Uricosurics         | 1.2% (62)                  | 0.70% (27)                 | 2.8% (35)               | <0.001  | M04AB            |
| Benzbromarone       | 1.2% (62)                  | 0.70% (27)                 | 2.8% (35)               | <0.001  | M04AB03          |
| Colchicine          | 0.41% (21)                 | 0.05% (2)                  | 1.5% (19)               | <0.001  | M04AC01          |

patients with gout). Other gout medications such as tiopurine, probenecid, sulfapyrazone and isobromindione were not used by any patient. Figure 1 shows that the proportion of patients with gout increases with lower eGFR, but even at eGFR within the normal range, a substantial fraction of patients with gout are not treated. Moreover, of all gout patients using a urate-lowering therapy, 47.2% still had hyperuricaemia. Supplementary data, Figure S1 shows that individuals not currently taking any gout medication had generally higher levels of eGFR than individuals who were taking gout medication, consistent with the prescription of gout medication in response to an increase in serum urate concentrations at lower levels of GFR. Individuals with gout had lower eGFR compared with individuals without, a finding that was observed overall and also among those not currently taking any gout medication.

### Distribution of serum urate concentrations and gout prevalence

The distribution of serum urate concentrations is shown across the range of eGFR (Supplementary data, Figure S2A) and UACR values (Supplementary data, Figure S2B). While serum urate concentrations showed a negative correlation with

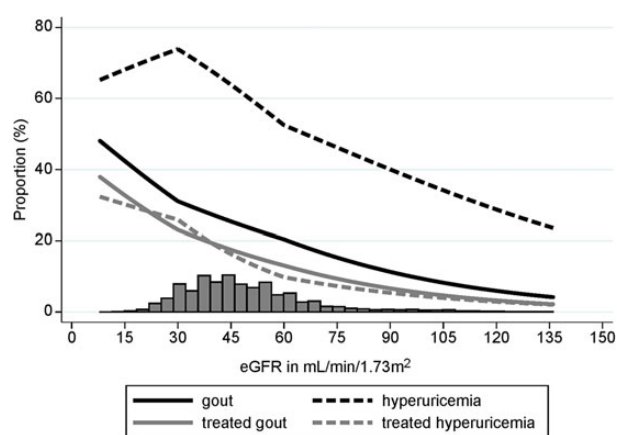

**FIGURE 1:** Linear spline graph of the proportion of the GCKD baseline population with gout (solid line) or hyperuricaemia (dashed line), stratified by the current use of gout medication, according to eGFR. The distribution of eGFR among all GCKD participants is shown as a histogram.

eGFR (Pearson correlation coefficient  $-0.254$ ,  $P < 0.0001$ ), there was no relevant correlation with UACR (Pearson correlation coefficient  $0.037$ ,  $P = 0.011$ ). The good fit of the linear



**Table 3. Prevalence of gout by kidney function measure**

| Gout | Prevalence |             | Model 1 |           | Model 2 |           | Model 3 |           |
|------|------------|-------------|---------|-----------|---------|-----------|---------|-----------|
|      | <i>n</i>   | %           | PR      | 95% CI    | PR      | 95% CI    | PR      | 95% CI    |
| G1/2 | 1102       | 16.0% (176) | Ref     | Ref       | Ref     | Ref       | Ref     | Ref       |
| G3a  | 1686       | 23.2% (391) | 1.42    | 1.21–1.68 | 1.17    | 0.99–1.38 | 1.13    | 0.96–1.33 |
| G3b  | 1842       | 27.6% (509) | 1.65    | 1.41–1.93 | 1.33    | 1.13–1.56 | 1.22    | 1.04–1.43 |
| G4/5 | 455        | 35.6% (162) | 2.17    | 1.80–2.61 | 1.70    | 1.41–2.06 | 1.46    | 1.21–1.77 |
| A1   | 2170       | 23.2% (503) | Ref     | Ref       | Ref     | Ref       | Ref     | Ref       |
| A2   | 1483       | 25.6% (379) | 1.08    | 0.96–1.22 | 1.09    | 0.97–1.22 | 1.10    | 0.98–1.23 |
| A3   | 1432       | 24.9% (356) | 1.05    | 0.93–1.19 | 1.09    | 0.96–1.24 | 1.09    | 0.96–1.24 |

Model 1 did not contain co-variables; model 2 adjusted for age, sex and study centre and model 3 adjusted additionally for BMI, waist-to-hip ratio, systolic blood pressure, triglycerides, CRP, HDL cholesterol, alcohol intake, diuretics use, CHD and diabetes. Sample size was 4836 patients with full covariable information. PR: prevalence ratio, CI: confidence interval. G and A refer to the CKD stages (see Materials and Methods).

**Table 4. Correlates of gout in the overall population and among those not currently using gout medication**

| Characteristic                       | Overall (4836) |           |         | Without gout medication (3259) |           |         |
|--------------------------------------|----------------|-----------|---------|--------------------------------|-----------|---------|
|                                      | PR             | 95% CI    | P value | PR                             | 95% CI    | P value |
| eGFR, G1                             | ref            |           |         |                                |           |         |
| eGFR, G2                             | 1.13           | 0.96–1.33 | 0.128   | 1.13                           | 0.84–1.52 | 0.428   |
| eGFR, G3                             | 1.22           | 1.04–1.43 | 0.013   | 1.19                           | 0.88–1.60 | 0.253   |
| eGFR, G4/5                           | 1.46           | 1.21–1.77 | <0.001  | 1.43                           | 0.98–2.11 | 0.065   |
| UACR, A1                             | ref            |           |         | ref                            |           |         |
| UACR, A2                             | 1.10           | 0.98–1.23 | 0.117   | 1.02                           | 0.81–1.29 | 0.864   |
| UACR, A3                             | 1.09           | 0.96–1.24 | 0.169   | 1.08                           | 0.84–1.40 | 0.543   |
| Male Sex                             | 1.47           | 1.27–1.71 | <0.001  | 1.44                           | 1.09–1.91 | 0.011   |
| Age, per 5 years                     | 1.08           | 1.05–1.11 | <0.001  | 1.13                           | 1.07–1.20 | <0.001  |
| BMI, kg/m <sup>2</sup>               | 1.03           | 1.02–1.04 | <0.001  | 1.01                           | 0.99–1.04 | 0.180   |
| Waist-to-hip ratio, per SD increase  | 1.11           | 1.03–1.19 | 0.003   | 1.10                           | 0.96–1.27 | 0.161   |
| Systolic blood pressure, per 10 mmHg | 1.01           | 0.98–1.03 | 0.616   | 1.03                           | 0.98–1.08 | 0.304   |
| HDL cholesterol, mg/dL               | 1.00           | 0.99–1.00 | 0.191   | 1.00                           | 0.99–1.01 | 0.866   |
| ln(Triglyceride), mg/dL              | 1.19           | 1.07–1.32 | 0.001   | 1.46                           | 1.19–1.78 | <0.001  |
| ln(CRP), mg/L                        | 1.09           | 1.04–1.14 | <0.001  | 1.15                           | 1.05–1.26 | 0.002   |
| Diabetes                             | 0.93           | 0.84–1.04 | 0.210   | 0.90                           | 0.72–1.12 | 0.328   |
| Coronary heart disease               | 1.05           | 0.94–1.17 | 0.429   | 1.19                           | 0.95–1.50 | 0.135   |
| Alcohol (moderate to large amount)   | 1.21           | 1.08–1.35 | 0.001   | 1.14                           | 0.89–1.45 | 0.295   |
| Diuretics use                        | 1.32           | 1.17–1.49 | <0.001  | 1.33                           | 1.07–1.66 | 0.011   |

Estimates are derived from the full model (model 3). PR: prevalence ratio, CI: confidence interval. G and A refer to the CKD stages (see Materials and Methods). The study centres Heidelberg and Aachen also showed significant association with increased gout prevalence, but adjustment was included for all study centres.

prediction of serum urate concentrations with the corresponding lowess smoother in Supplementary data, Figure S2 indicates that the relationship between eGFR and serum urate was approximately linear across the range of eGFR values. Whereas serum urate was higher in males than in females across the range of UACR, the sex difference for serum urate concentrations decreased with lower eGFR and was not observed anymore as eGFR approached ~40 mL/min/1.73 m<sup>2</sup>. Supplementary data, Table S1A and B show baseline study characteristics by category of eGFR and UACR, respectively, and support the observation that serum urate concentrations increase with lower eGFR but not higher UACR.

Gout prevalence showed a gradual increase with lower eGFR from 16.0% among those with an eGFR >60 mL/min/1.73 m<sup>2</sup> to 35.6% among those with an eGFR <30 mL/min/1.73 m<sup>2</sup> (Table 3). No difference in gout prevalence was observed across categories of UACR. When eGFR decreased to 30 mL/min/

1.73 m<sup>2</sup>, the predicted proportions of hyperuricaemia and gout reached 73 and 30%, respectively (Figure 1). Because relatively few participants had an eGFR of <30 mL/min/1.73 m<sup>2</sup>, the predictions within this range of eGFR may not be very precise. Table 3 shows that, when compared with an eGFR of ≥60 mL/min/1.73 m<sup>2</sup>, the unadjusted PR of gout was significantly increased by 1.42-fold, 1.65-fold and 2.17-fold for those with an eGFR of 45–59, 30–44 and <30 mL/min/1.73 m<sup>2</sup>. The significant association between gout and lower eGFR persisted after adjusting for age, sex and study centre as well as upon further extensive adjustment for potential confounders for CKD stages 3b and 4/5, but the magnitude of the ratios decreased. The PR of gout by category of UACR was not significant in unadjusted analyses, and—compared with individuals with normoalbuminuria—showed modest and insignificant associations for both microalbuminuria and macroalbuminuria [PR 1.09, 95% confidence interval (CI) 0.96–1.24, Table 3]. Associations obtained

**Table 5. Prevalence of gout by CKD aetiology**

| Characteristic entities       | No gout (n = 3845) | Gout (n = 1238) | Overall (n = 5083) | P value |
|-------------------------------|--------------------|-----------------|--------------------|---------|
| Diabetic nephropathy, %       | 24.4               | 33.8            | 26.7               | <0.001  |
| Nephrosclerosis, %            | 38.8               | 48.7            | 41.2               | <0.001  |
| Systemic diseases, %          | 11.5               | 12.4            | 11.8               | 0.38    |
| Primary glomerular disease, % | 23.9               | 19.8            | 22.9               | 0.003   |
| Interstitial nephropathy, %   | 8.3                | 9.5             | 8.6                | 0.21    |
| Acute kidney injury, %        | 4.6                | 5.0             | 4.7                | 0.53    |
| Solitary kidney, %            | 6.3                | 6.4             | 6.3                | 0.89    |
| Hereditary diseases, %        | 5.1                | 2.8             | 4.5                | 0.001   |
| Obstructive uropathy, %       | 7.6                | 6.5             | 7.3                | 0.19    |

Percentages do not sum up to 100% because individuals could be assigned more than a single cause of CKD by their treating nephrologist. P value is obtained from a comparison of the proportion of patients with a specific CKD category among those with and without gout.

from logistic regression models were similar but risk estimates were higher; therefore, the more conservative estimates from Poisson regression models are shown throughout.

### Correlates of self-reported gout

To identify factors that are independently associated with gout, regression models were employed that included multiple covariates selected based on the prior literature and gout pathophysiology [9, 33]. As displayed in Table 4, advanced age, male sex, higher BMI, WHR, triglyceride concentrations and CRP, a moderate or large amount of alcohol intake, diuretics use and some of the study centres were significantly associated with gout. Among these correlates, the strongest associations were observed for advanced age, higher BMI and male sex, followed by diuretics use and an eGFR of <30 mL/min/1.73 m<sup>2</sup> (RR 1.46, 95% CI 1.21–1.77). Systolic BP, HDL-cholesterol concentrations, CHD and diabetes did not show significant association with gout upon multivariable adjustment, although they showed association in univariate analyses (see Table 1). Higher UACR categories were not independently associated with gout, and this was true in the overall GCKD population (Table 4) as well as in the patients with eGFR <60 only [*n* = 3794, PR for microalbuminuria 1.09 (95% CI 0.96–1.23) and for macroalbuminuria 1.09 (0.95–1.25)].

For comparison, Supplementary data, Table S2 shows the corresponding estimates for serum urate concentrations. Mean serum urate concentrations showed a graded and significant increase with lower eGFR, which remained significant upon multivariable adjustment. Significant positive associations between serum urate and higher UACR were observed, but—similar to the associations with gout—were of lesser magnitude than the associations between serum urate and eGFR. To evaluate to which extent serum urate influenced the associations between gout and its correlates, serum urate was included as an additional covariable. While this had little effect in the overall study population, the association between eGFR and gout became

insignificant upon adjustment for urate among those not currently using any gout medication (data not shown).

Lastly, we evaluated whether gout prevalence differed by CKD aetiology. The proportions of patients with diabetic nephropathy and nephrosclerosis were significantly higher among patients with gout compared with those without gout, consistent with the epidemiological correlation of gout with diabetes and hypertension (Table 5). The prevalence of hereditary nephropathy was significantly lower among those with gout, consistent with the younger age and specific cause of disease in these patients. The addition of CKD aetiology to the multivariable-adjusted model presented in Table 4 showed that diabetic nephropathy, nephrosclerosis and hereditary nephropathy were not independently associated with gout, suggesting that the different proportion of these CKD aetiologies in patients with and without gout can be explained by one or more of the other known gout correlates such as age.

## DISCUSSION

This study is the first epidemiological investigation of gout prevalence among a large CKD patient population, a high-risk group for gout. The prevalence of gout was 24.3% in the overall GCKD population and increased with lower eGFR from 16.0% (eGFR of ≥60 mL/min/1.73 m<sup>2</sup>) to 35.6% (eGFR <30 mL/min/1.73 m<sup>2</sup>), highlighting the large burden of disease posed by the painful condition of gout and its sequelae. Moreover, we found evidence for significant undertreatment; ~30% of those with gout received no uric acid lowering medication, and among those who are treated almost half remained hyperuricaemic.

The prevalence of gout in this CKD population is about 10 times greater compared with estimates reported from population-based studies and studies of individuals with normal renal function [23]. A study conducted among individuals with CKD identified in the nationally representative population-based National Health and Nutrition Examination Survey (NHANES) found a similar gout prevalence of 35% among those with stage 4 CKD, but lower gout prevalence of 11% among those with stage 3 CKD compared with our estimate of ~25% for CKD stages 3a and 3b [22]. A potential reason for these discrepancies is that a diagnosis of CKD stage 3 based on one measurement of serum creatinine in population-based settings such as the NHANES survey is less valid than the verified presence of CKD in patients under nephrological care, the source population of the GCKD study.

Our results of an inverse relationship between eGFR and gout as well as hyperuricaemia are consistent with other studies [21–23], but the association between albuminuria and gout is less clear. In contrast to our study, Juraschek *et al.* [22] found a graded positive relationship between gout and albuminuria, and Krishnan *et al.* [24] stated that proteinuria independently associated with increased risk of gout. A potential explanation for this discrepancy is the fact that most GCKD patients were enrolled because of an eGFR <60 mL/min/1.73 m<sup>2</sup>, and the finding that UACR is not an independent correlate of gout in patients with CKD stage 3 or higher may not be representative of the relationship of UACR and gout in healthy

reference and/or non-CKD populations. In addition, very high UACR levels in CKD populations are often found in individuals with primary glomerular diseases, who are often younger and have CKD of auto-immune aetiology compared with older individuals with diabetes who typically have high UACR in population-based studies.

The relationship between gout and CKD is bidirectional. Although reduced kidney function can precede the development of gout [24], gout can also adversely impact renal function [34, 35]. Elevated serum urate concentrations and medication toxicity have been postulated as factors by which these conditions can lead to reduced renal function [36]. In addition, there are numerous shared correlates between the two conditions, with prevalence of 55.4% for obesity, 46.3% for diabetes, 26.7% for CHD and 97.4% for hypertension among the patients with gout in the GCKD study. Prospective studies specifically in CKD populations including different CKD stages and detailed information on medication intake are needed to determine incidence rates and correlates of new-onset gout.

Medication to treat and prevent gout is available, but the treatment of gout was reported to be suboptimal by several studies [5, 37]. The necessity to permanently maintain serum urate levels below its saturation point means that often life-long treatment is required and cost-effective treatments are needed. Typically, the xanthine oxidase inhibitor allopurinol is prescribed as urate-lowering therapy [38], with other medication having less favourable side effect profiles or higher associated costs. The high proportion of patients with gout that showed hyperuricaemia despite treatment would be even higher if the therapeutic target for urate-lowering therapy (ULT) would be  $<6$  mg/dL, a threshold suggested to be associated with the slowing of CKD progression [39]. This is also illustrated in a recent publication that—using a cut-off of 6 mg/dL in a general population-based sample—reported that half of US Americans with gout on urate-lowering therapy were still hyperuricaemic [40], a proportion comparable with the one we report in a CKD population using a higher cut-off of  $>7$  mg/dL in men. These numbers clearly illustrate that pharmacologic management of gout in patients with CKD is suboptimal and underscores the need to achieve better urate treatment target rates using available treatment or additional novel urate-lowering therapies. Of note, however, there is a lack of prospective interventional trials in CKD patients assessing the risk benefit relationship of urate-lowering therapy [41]. This lack of evidence may influence treatment decisions and contribute to the relatively large fraction of patients with gout that remain untreated.

The present study has several limitations. First, a gold-standard definition of gout (crystal aspiration or ACR criteria) was not available and should be obtained for future studies of gout risk in patients with CKD. The use of self-reported physician-diagnosed gout may incorporate some misclassification, which may affect prevalence estimates but should not lead to false-positive correlate associations. Second, no data on dietary intake was available, which likewise should be assessed in future studies among CKD patients. Third, our study was based on data collected at the GCKD study enrolment visit, and we can therefore not answer questions related to the

temporality of the association between eGFR and gout, or between the presence of gout and incident health outcomes such as renal replacement therapy. However, this will be possible in the future once prospective data become available. Our current study provides information on the prevalence of gout and which correlates to examine, and therefore facilitates future studies on new-onset gout. Our analyses were conducted using an ethnically homogenous German population of patients with mostly stage 3 CKD at enrolment, and our findings may therefore not be generalizable to other ethnic groups or countries or individuals with other CKD stages. Because of the general health-care coverage in Germany, we believe that access to care should have little impact on our findings, which may be different in other settings. A particular strength is that our results are based on one of the largest cohorts of CKD patients worldwide, and the standardized collection of information provides a sound foundation to the evidence reported here. Because of the substantial morbidity associated with gout, our findings are potentially of high clinical relevance and should stimulate and help design future interventional trials.

In conclusion, gout is a highly prevalent comorbidity in patients with CKD, and prevalence increases with lower eGFR. A third of CKD patients with gout are not treated for the condition, and among those who are treated almost half still show hyperuricaemia. CKD patients represent a high-risk population for gout and screening for and treatment of gout in this population deserves special attention.

## SUPPLEMENTARY MATERIAL

Supplementary data are available online at <http://ndt.oxfordjournals.org>.

## ACKNOWLEDGEMENTS

We thank all GCKD study participants for their time and important contributions, all participating nephrologists' practices and outpatient clinics for their continued support, as well as the GCKD study personnel for their enormous commitment. GCKD investigators and nephrologists collaborating with the GCKD study are:

University of Erlangen-Nürnberg, Germany: Kai-Uwe Eckardt, Stephanie Titze, Hans-Ulrich Prokosch, Barbara Bärthlein, André Reis, Arif B. Ekici, Olaf Gefeller, Karl F. Hilgers, Silvia Hübner, Susanne Avendaño, Dinah Becker-Grosspitsch, Nina Hauck, Susanne A. Seuchter, Birgit Hausknecht, Marion Rittmeier, Anke Weigel, Andreas Beck, Thomas Ganslandt, Sabine Knispel, Thomas Dressel, Martina Malzer

Technical University of Aachen, Germany: Jürgen Floege, Frank Eitner, Georg Schlieper, Katharina Findeisen, Elfriede Arweiler, Sabine Ernst, Mario Unger, Stefan Lipski

Charité, Humboldt-University of Berlin, Germany: Elke Schaeffner, Seema Baid-Agrawal, Kerstin Petzold, Ralf Schindler

University of Freiburg, Germany: Anna Köttgen, Ulla Schultheiss, Simone Meder, Erna Mitsch, Ursula Reinhard, Gerd Walz

Hannover Medical School, Germany: Hermann Haller, Johan Lorenzen, Jan T. Kielstein, Petra Otto

University of Heidelberg, Germany: Claudia Sommerer, Claudia Föllinger, Martin Zeier

University of Jena, Germany: Gunter Wolf, Martin Busch, Katharina Paul, Lisett Dittrich

Ludwig-Maximilians University of München, Germany: Thomas Sitter, Robert Hilge, Claudia Blank

University of Würzburg, Germany: Christoph Wanner, Vera Krane, Daniel Schmiedeke, Sebastian Toncar, Daniela Cavitt, Karina Schönowsky, Antje Börner-Klein

Innsbruck Medical University, Austria: Florian Kronenberg, Julia Raschenberger, Barbara Kollerits, Lukas Forer, Sebastian Schönherr, Hansi Weißensteiner

University of Regensburg, Germany: Peter Oefner, Wolfram Gronwald, Helena Zacharias

Department of Medical Biometry, Informatics and Epidemiology (IMBIE), University of Bonn: Matthias Schmid.

## FUNDING

The GCKD study is funded by grants from the German Ministry of Education and Research (BMBF) ([www.gesundheitsforschung-bmbf.de/de/2101.php](http://www.gesundheitsforschung-bmbf.de/de/2101.php); grant numbers 01ER 0804, 01ER 0818, 01ER 0819, 01ER 0820 und 01ER 0821) and the KfH Foundation for Preventive Medicine ([www.kfh-stiftung-praeventivmedizin.de/stiftung.html](http://www.kfh-stiftung-praeventivmedizin.de/stiftung.html)). It is conducted under the auspices of the German Society of Nephrology (DGfN) (<http://www.dgfn.eu>). J.J. was supported by the Chinese Scholarship Council. A.K. was supported by the Emmy Noether Programme of the German Research Foundation (KO 3598/2-1).

## CONFLICT OF INTEREST STATEMENT

The authors report no conflict of interest. The results presented in this paper have not been published previously in whole or part, except in abstract format.

## REFERENCES

- Lawrence RC, Felson DT, Helmick CG *et al*. Estimates of the prevalence of arthritis and other rheumatic conditions in the United States. Part II. *Arthritis Rheum* 2008; 58: 26–35
- Neogi T. Gout. *N Engl J Med* 2011; 364: 443–452
- Annemans L, Spaepen E, Gaskin M *et al*. Gout in the UK and Germany: prevalence, comorbidities and management in general practice 2000–2005. *Ann Rheum Dis* 2008; 67: 960–966
- Choi HK, Mount DB, Reginato AM. Pathogenesis of gout. *Ann Intern Med* 2005; 143: 499–516
- Kuo CF, Grainge MJ, Mallen C *et al*. Rising burden of gout in the UK but continuing suboptimal management: a nationwide population study. *Ann Rheum Dis* 2014; doi:10.1136/annrheumdis-2013-204463
- Zhu Y, Pandya BJ, Choi HK. Prevalence of gout and hyperuricemia in the US general population: the National Health and Nutrition Examination Survey 2007–2008. *Arthritis Rheum* 2011; 63: 3136–3141
- Trifiro G, Morabito P, Cavagna L *et al*. Epidemiology of gout and hyperuricaemia in Italy during the years 2005–2009: a nationwide population-based study. *Ann Rheum Dis* 2013; 72: 694–700
- Smith E, Hoy D, Cross M *et al*. The global burden of gout: estimates from the Global Burden of Disease 2010 study. *Ann Rheum Dis* 2014; 73: 1470–1476
- Roddy E, Choi HK. Epidemiology of Gout. *Rheum Dis Clin North Am* 2014; 40: 155–175
- Wu EQ, Patel PA, Yu AP *et al*. Disease-related and all-cause health care costs of elderly patients with gout. *J Manag Care Pharm* 2008; 14: 164–175
- Krishnan E, Lienesch D, Kwok CK. Gout in ambulatory care settings in the United States. *J Rheumatol* 2008; 35: 498–501
- Choi HK, Curhan G. Gout: epidemiology and lifestyle choices. *Curr Opin Rheumatol* 2005; 17: 341–345
- Bhole V, de Vera M, Rahman MM *et al*. Epidemiology of gout in women: Fifty-two-year followup of a prospective cohort. *Arthritis Rheum* 2010; 62: 1069–1076
- DeMarco MA, Maynard JW, Huizinga MM *et al*. Obesity and younger age at gout onset in a community-based cohort. *Arthritis Care Res* 2011; 63: 1108–1114
- Maynard JW, McAdams-DeMarco MA, Law A *et al*. Racial differences in gout incidence in a population-based cohort: Atherosclerosis Risk in Communities Study. *Am J Epidemiol* 2014; 179: 576–583
- McAdams-DeMarco MA, Maynard JW, Baer AN *et al*. Hypertension and the risk of incident gout in a population-based study: the atherosclerosis risk in communities cohort. *J Clin Hypertens (Greenwich)* 2012; 14: 675–679
- Choi HK, Atkinson K, Karlson EW *et al*. Obesity, weight change, hypertension, diuretic use, and risk of gout in men: the health professionals follow-up study. *Arch Intern Med* 2005; 165: 742–748
- Choi HK, Atkinson K, Karlson EW *et al*. Purine-rich foods, dairy and protein intake, and the risk of gout in men. *N Engl J Med* 2004; 350: 1093–1103
- Choi HK, Atkinson K, Karlson EW *et al*. Alcohol intake and risk of incident gout in men: a prospective study. *Lancet* 2004; 363: 1277–1281
- Mount DB. The kidney in hyperuricemia and gout. *Curr Opin Nephrol Hypertens* 2013; 22: 216–223
- McAdams-DeMarco MA, Law A, Maynard JW *et al*. Risk factors for incident hyperuricemia during mid-adulthood in African American and white men and women enrolled in the ARIC cohort study. *BMC Musculoskelet Disord* 2013; 14: 347
- Juraschek SP, Kovell LC, Miller ER, III *et al*. Association of kidney disease with prevalent gout in the United States in 1988–1994 and 2007–2010. *Semin Arthritis Rheum* 2013; 42: 551–561
- Krishnan E. Reduced glomerular function and prevalence of gout: NHANES 2009–10. *PLoS One* 2012; 7: e50046
- Krishnan E. Chronic kidney disease and the risk of incident gout among middle-aged men: a seven-year prospective observational study. *Arthritis Rheum* 2013; 65: 3271–3278
- Jolly SE, Mete M, Wang H *et al*. Uric acid, hypertension, and chronic kidney disease among Alaska Eskimos: the Genetics of Coronary Artery Disease in Alaska Natives (GOCADAN) study. *J Clin Hypertens (Greenwich)* 2012; 14: 71–77
- KDIGO. Clinical practice guideline for the evaluation and management of chronic kidney disease. *Kidney Int Suppl* 2013; 3: 1–150
- Zhang L, Wang F, Wang L *et al*. Prevalence of chronic kidney disease in China: a cross-sectional survey. *Lancet* 2012; 379: 815–822
- Eckardt KU, Barthlein B, Baid-Agrawal S *et al*. The German Chronic Kidney Disease (GCKD) study: design and methods. *Nephrol Dial Transplant* 2012; 27: 1454–1460
- McAdams MA, Maynard JW, Baer AN *et al*. Reliability and sensitivity of the self-report of physician-diagnosed gout in the campaign against cancer and heart disease and the atherosclerosis risk in the community cohorts. *J Rheumatol* 2011; 38: 135–141
- Feig DI, Kang DH, Johnson RJ. Uric acid and cardiovascular risk. *N Engl J Med* 2008; 359: 1811–1821
- Levey AS, Stevens LA, Schmid CH *et al*. A new equation to estimate glomerular filtration rate. *Ann Intern Med* 2009; 150: 604–612



32. Zou G. A modified Poisson regression approach to prospective studies with binary data. *Am J Epidemiol* 2004; 159: 702–706
33. Riches PL, Wright AF, Ralston SH. Recent insights into the pathogenesis of hyperuricaemia and gout. *Hum Mol Genet* 2009; 18(R2): R177–R184
34. Yu KH, Kuo CF, Luo SF *et al.* Risk of end-stage renal disease associated with gout: a nationwide population study. *Arthritis Res Ther* 2012; 14: R83
35. Krishnan E, Akhras KS, Sharma H *et al.* Serum urate and incidence of kidney disease among veterans with gout. *J Rheumatol* 2013; 40: 1166–1172
36. Badve SV, Brown F, Hawley CM *et al.* Challenges of conducting a trial of uric-acid-lowering therapy in CKD. *Nat Rev Nephrol* 2011; 7: 295–300
37. Fuldeore MJ, Riedel AA, Zarotsky V *et al.* Chronic kidney disease in gout in a managed care setting. *BMC Nephrol* 2011; 12: 36

38. Rees F, Hui M, Doherty M. Optimizing current treatment of gout. *Nat Rev Rheumatol* 2014; 10: 271–283
39. Levy GD, Rashid N, Niu F *et al.* Effect of urate-lowering therapies on renal disease progression in patients with hyperuricemia. *J Rheumatol* 2014; 41: 955–962
40. Juraschek SP, Kovell LC, Miller ER, III *et al.* Gout, Urate Lowering Therapy and Uric Acid Levels among US Adults. *Arthritis Care Res* 2014; doi: 10.1002/acr.22469
41. Bose B, Badve SV, Hiremath SS *et al.* Effects of uric acid-lowering therapy on renal outcomes: a systematic review and meta-analysis. *Nephrol Dial Transplant* 2014; 29: 406–413

Received for publication: 25.8.2014; Accepted in revised form: 9.10.2014

*Nephrol Dial Transplant* (2015) 30: 621–630  
doi: 10.1093/ndt/gfu362  
Advance Access publication 23 November 2014

## Urinary exosomes in the diagnosis of Gitelman and Bartter syndromes

Samuele Corbetta<sup>1,\*\*</sup>, Francesca Raimondo<sup>1,\*\*</sup>, Silvana Tedeschi<sup>2</sup>, Marie-Louise Syrén<sup>2,3</sup>, Paola Rebora<sup>4</sup>, Andrea Savoia<sup>1</sup>, Lorenza Baldi<sup>5</sup>, Alberto Bettinelli<sup>6</sup> and Marina Pitto<sup>1</sup>

<sup>1</sup>Department of Health Sciences, University of Milano-Bicocca, Monza, Italy, <sup>2</sup>Laboratory of Medical Genetics, Fondazione IRCCS Ca' Granda Maggiore Policlinico Hospital, Milan, Italy, <sup>3</sup>Department of Clinical Sciences and Community Health, University of Milan, Milan, Italy, <sup>4</sup>Center of Biostatistics for Clinical Epidemiology, Department of Health Sciences, University of Milano-Bicocca, Monza, Italy, <sup>5</sup>Department of Laboratory Medicine, San Leopoldo Mandic Hospital, Merate, Lecco, Italy and <sup>6</sup>Department of Pediatrics, San Leopoldo Mandic Hospital, Merate, Lecco, Italy

Correspondence and offprint requests to: Marina Pitto; E-mail: marina.pitto@unimib.it

<sup>\*\*</sup>These authors contributed equally.

### ABSTRACT

**Background.** Gitelman syndrome (GS) and Bartter syndrome (BS) are hereditary salt-losing tubulopathies (SLTs) resulting from defects of renal proteins involved in electrolyte reabsorption, as for sodium-chloride cotransporter (NCC) and furosemide-sensitive sodium-potassium-chloride cotransporter (NKCC2) cotransporters, affected in GS and BS Type 1 patients, respectively. Currently, definitive diagnosis is obtained through expensive and time-consuming genetic testing. Urinary exosomes (UE), nanovesicles released by every epithelial cell facing the urinary space, represent an ideal source of markers for renal dysfunction and injury, because UE molecular composition stands for the cell of origin. On these assumptions, the aim of this work is to evaluate the relevance of UE for the diagnosis of SLTs.

**Methods.** UE were purified from second morning urines collected from 32 patients with genetically proven SLTs (GS, BS1, BS2 and BS3 patients), 4 with unclassified SLTs and 22 control subjects (age and sex matched). The levels of NCC and NKCC2 were evaluated in UE by SDS-PAGE/western blotting with specific antibodies.

**Results.** Due to their location on the luminal side of tubular cells, NCC and NKCC2 are well represented in UE proteome. The NCC signal is significantly decreased/absent in UE of Gitelman patients compared with control subjects (Mann-Whitney *t*-test, *P* < 0.001) and, similarly, the NKCC2 in those of Bartter type 1 (*P* < 0.001). The difference in the levels of the two proteins allows recognition of Gitelman and Bartter type 1 patients from controls and, combined with clinical data, from other Bartter patients. Moreover, the receiver operating characteristic curve analysis using UE NCC densitometric values
